# Supplementary material for: Highly improved upconversion luminescence in NaGd(WO4)2:Yb3+/Tm3+inverse opal photonic crystals
Source: Royal Society of Chemistry journal article supplement (doi:10.1039/c4nr05688d), 2014-11-20
Supplement: c4nr05688d1.pdf [file c4nr05688d1.pdf]

## **Highly Improved Upconversion Luminescence in**

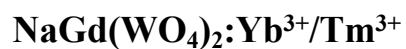

## **Inverse Opal Photonic Crystals**

Yunfeng Wang<sup>†‡</sup>, Wen Xu<sup>†</sup>, Shaobo Cui<sup>†‡</sup>, Sai Xu<sup>†</sup>, Ze Yin<sup>†</sup>, Hongwei Song<sup>\*†</sup>,  
Pingwei Zhou<sup>†</sup>, Xiaoyan Liu<sup>†</sup>, Lin Xu<sup>†</sup>, and Haining Cui<sup>\*‡</sup>

<sup>†</sup> State Key Laboratory on Integrated Optoelectronics, College of Electronic Science  
and Engineering, Jilin University, 2699 Qianjin Street, Changchun 130012, China

<sup>‡</sup> College of Physics, Jilin University, 2699 Qianjin Street, Changchun 130012, China

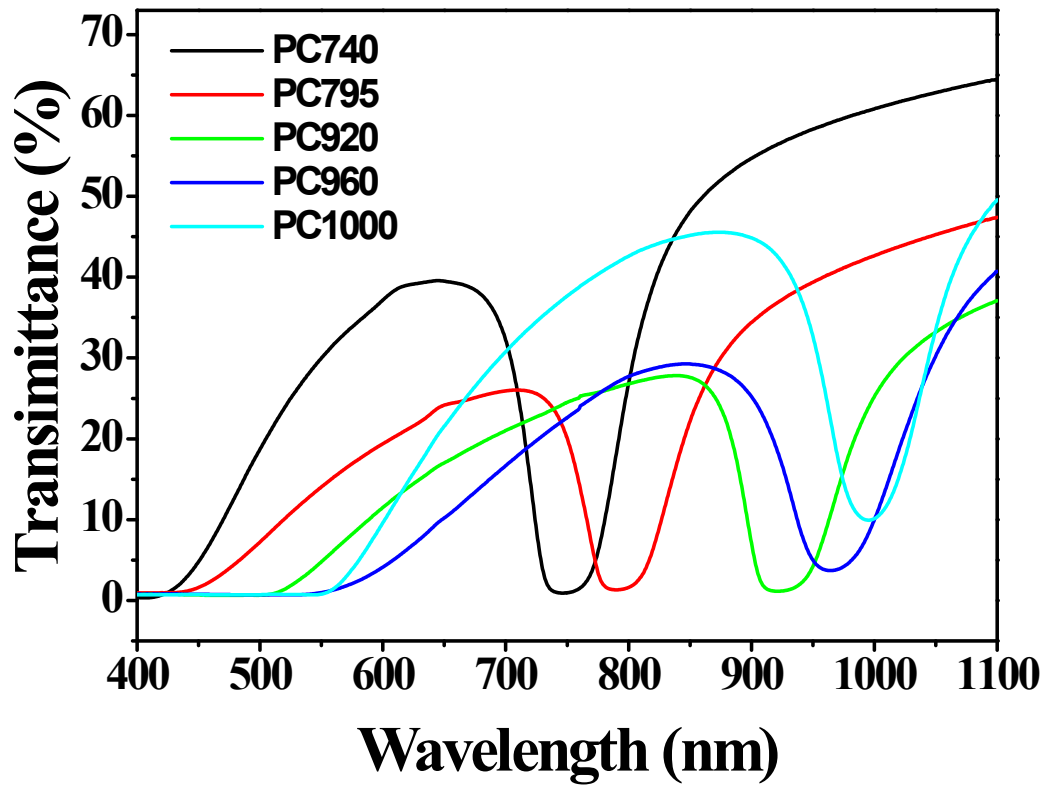

**Figure s1:** Transmittance spectra of the PMMA templates measured at  $\theta = 0^\circ$ .

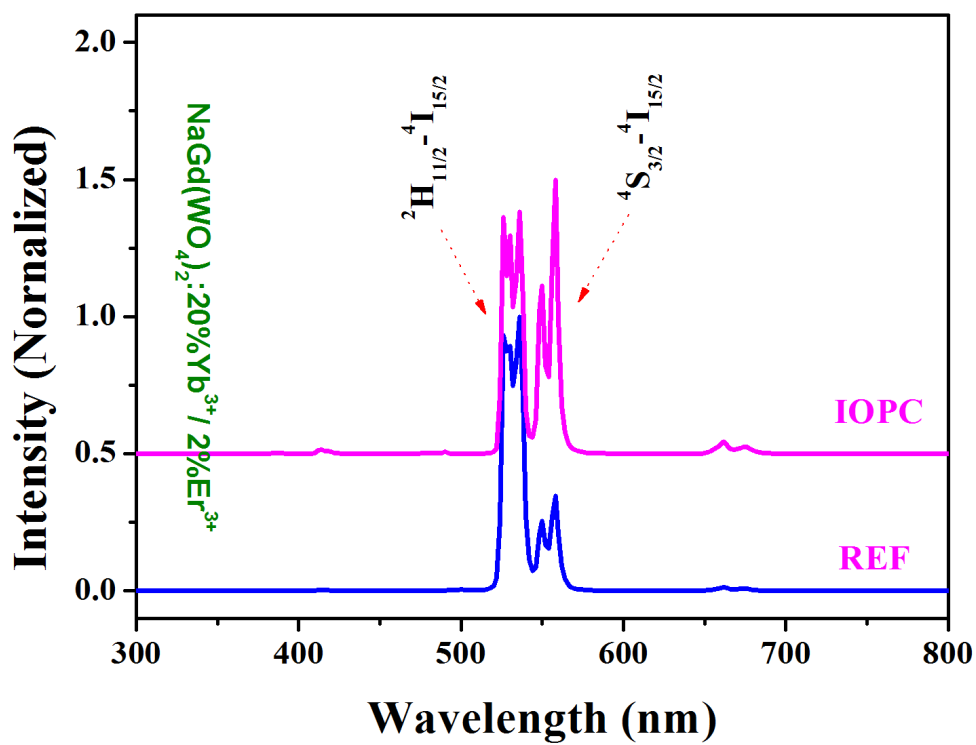

**Figure S2:** The typical UCL spectra of the IOPC and REF samples under the 980 nm NIR excitation power density ( $75\text{mW/mm}^2$ ) with the doping concentration of 20%  $Yb^{3+}/2\%Er^{3+}$ .

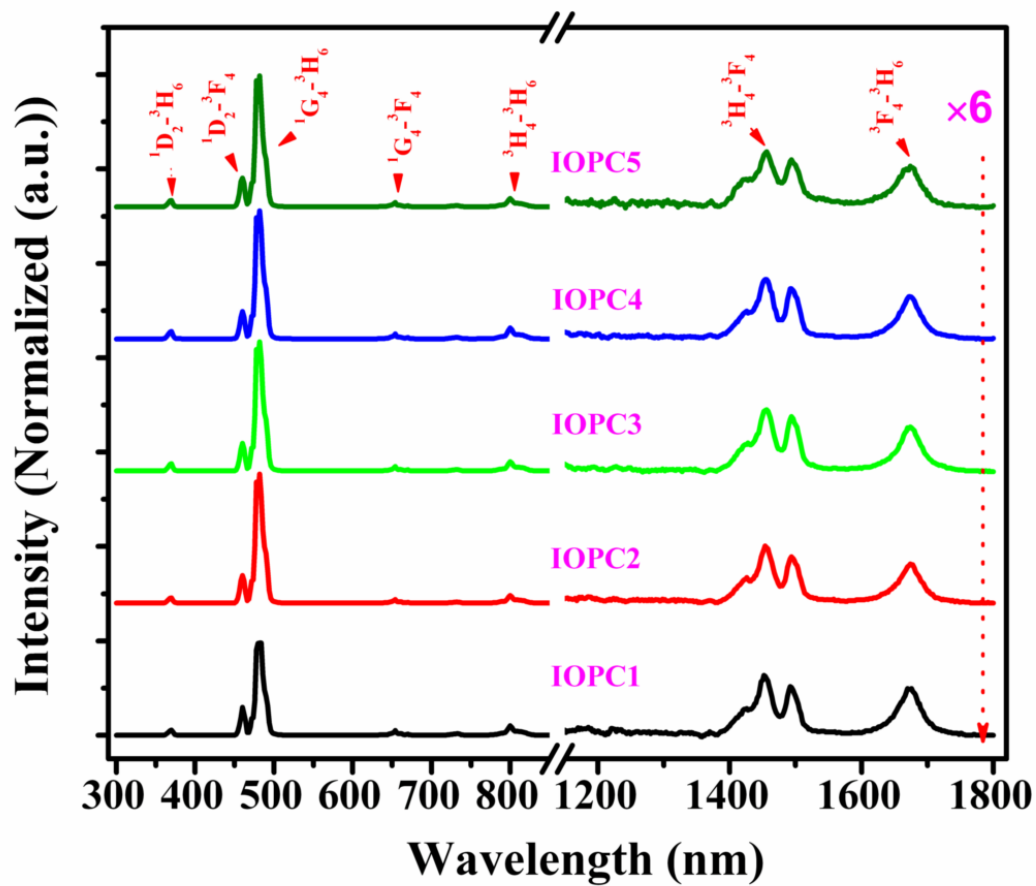

**Figure S3:** The UCL and NIR emission lines of the  $\text{NaGd(WO}_4)_2 : 20\%\text{Yb}^{3+}/0.5\text{Tm}^{3+}$  IOPCs with the different PSBs under the same 980 nm NIR excitation power density ( $75\text{mW/mm}^2$ ).

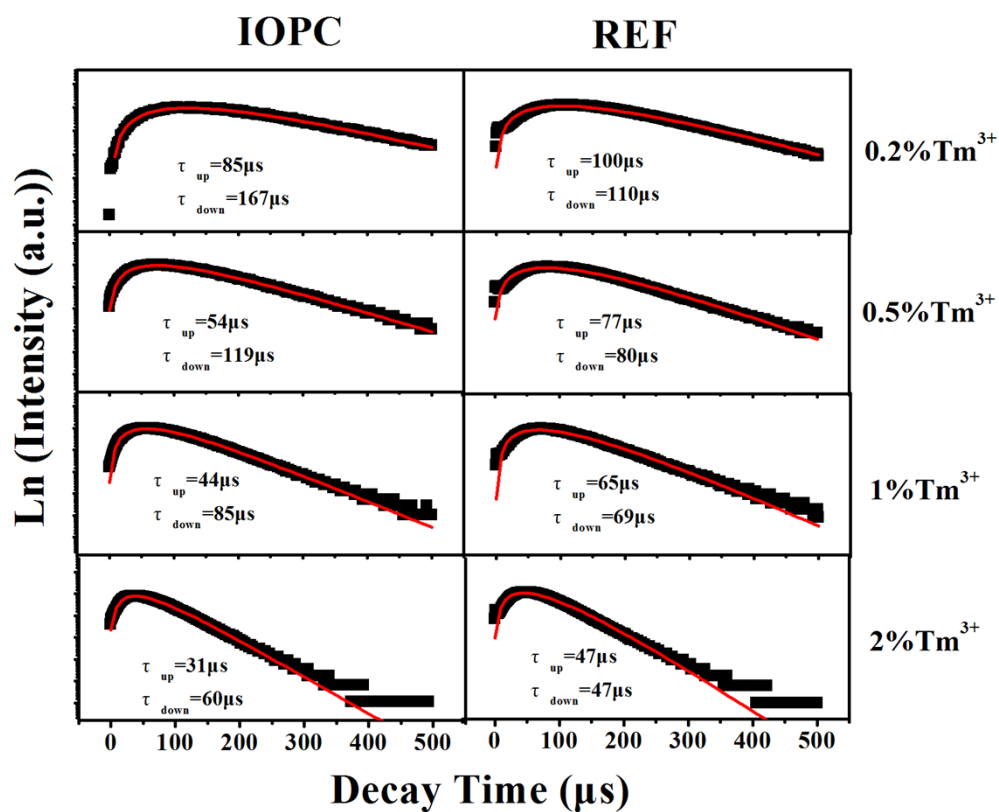

**Figure S4:** The UCL decay dynamics of the transitions at 480nm of  $Tm^{3+}$  ions in  $NaGd(WO_4)_2:20\%Yb^{3+}/xTm^{3+}$  IOPC and REF samples with the different doping concentrations of  $Tm^{3+}$  ions (0.2%, 0.5%, 1% and 2%) by monitoring the UC emissions under the excitation of 980 nm laser.

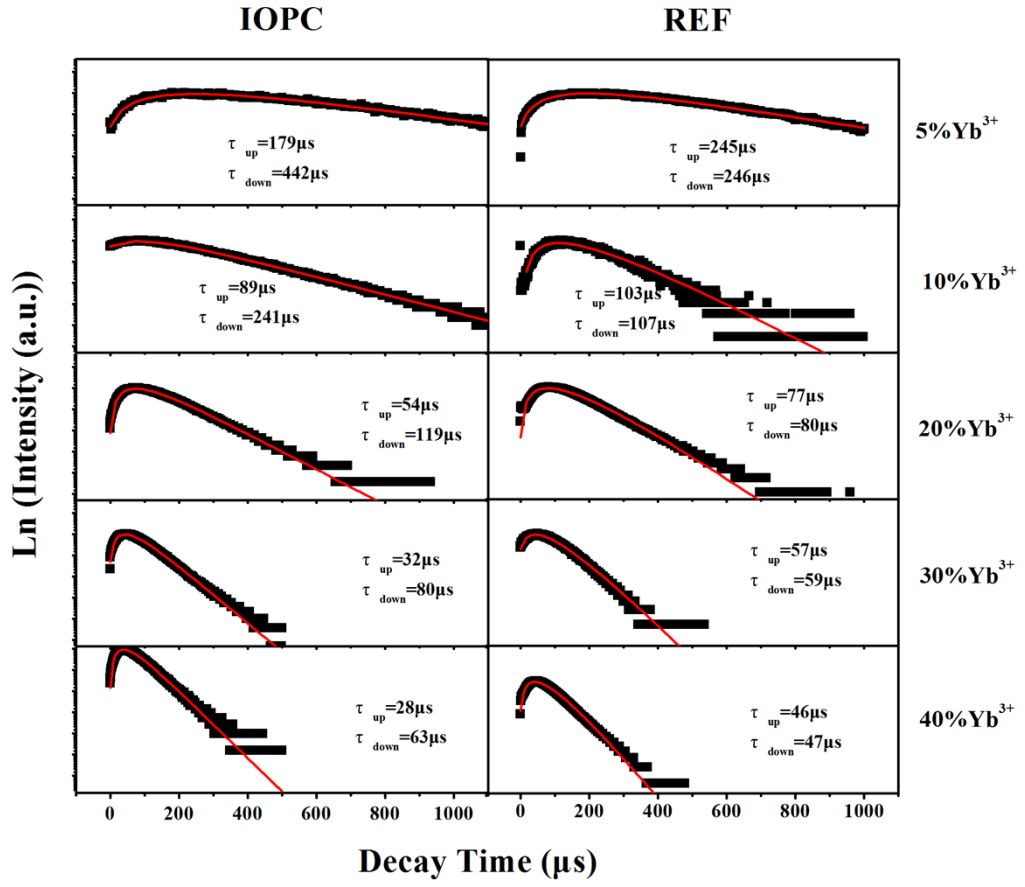

**Figure S5:** The UCL decay dynamics of the transitions at 480nm of  $Tm^{3+}$  ions in  $NaGd(WO_4)_2:xYb^{3+}/0.5\%Tm^{3+}$  IOPC and REF samples with the different doping concentrations of  $Yb^{3+}$  ions (5%, 10%, 20%, 30% and 40%) by monitoring the UC emissions under the excitation of 980 nm laser.

Based on the principle of energy conservation law,

$$\begin{aligned}\eta_{UC}(IOPC) + \eta_{DC}(IOPC) + \eta_T(IOPC) &= 1 \\ \eta_{UC}(REF) + \eta_{DC}(REF) + \eta_T(REF) &= 1\end{aligned}$$

Where  $\eta_{UC}$  is the UCL efficiency,  $\eta_{DC}$  is the DCL efficiency,  $\eta_T$  is the thermal radiative efficiency. According to the experimental result of Figure 11  $\eta_T(IOPC) > \eta_T(REF)$ ,

$$\eta_{UC}(IOPC) + \eta_{DC}(IOPC) > \eta_{UC}(REF) + \eta_{DC}(REF)$$

$$\frac{\eta_{UC}(IOPC)}{\alpha} > \frac{\eta_{UC}(REF)}{\beta}$$

$$\alpha = \frac{\eta_{UC}(IOPC)}{\eta_{UC}(IOPC) + \eta_{DC}(IOPC)} \quad \beta = \frac{\eta_{UC}(REF)}{\eta_{UC}(REF) + \eta_{DC}(REF)}$$

Where  $\alpha$  and  $\beta$  represent the ratio of UCL to UCL+DCL. According to the Equation above, the decrease of DCL in the IOPC would inevitably induce the increase of UCL.
